# Supplementary material
Source: PubMed Central journal article supplement (PMC5807002)
Supplement: NIHMS936973-supplement-Supplemental_Information.pdf [file NIHMS936973-supplement-Supplemental_Information.pdf]

**Supporting Information: Characterizing the structure-function relationship of a naturally-occurring RNA thermometer**

Sarai Meyer<sup>1</sup>, Paul D. Carlson<sup>1</sup> and Julius B. Lucks<sup>2\*</sup>

<sup>1</sup> Robert F. Smith School of Chemical and Biomolecular Engineering, Cornell University; 120 Olin Hall; Ithaca, NY 14853; USA

<sup>2</sup> Department of Chemical and Biological Engineering, Northwestern University; 2145 Sheridan Rd.; Evanston, IL 60208; USA

\*Corresponding author: [jblucks@northwestern.edu](mailto:jblucks@northwestern.edu); Telephone: (847) 467-2943

## Supplementary Figures

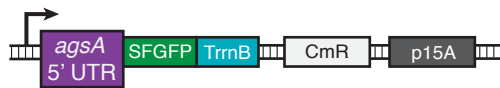

**Figure S1.** Plasmid architecture of the *agsA* testing constructs. The wild-type (WT) or mutant *agsA* 5' UTR (purple) is fused directly after the J23119 promoter (black arrow), followed by the fluorescent reporter SFGFP (green) and the *rrnB* intrinsic terminator (blue). The plasmid also harbors the chloramphenicol resistance selection marker (light gray) and the p15a origin of replication (dark gray).

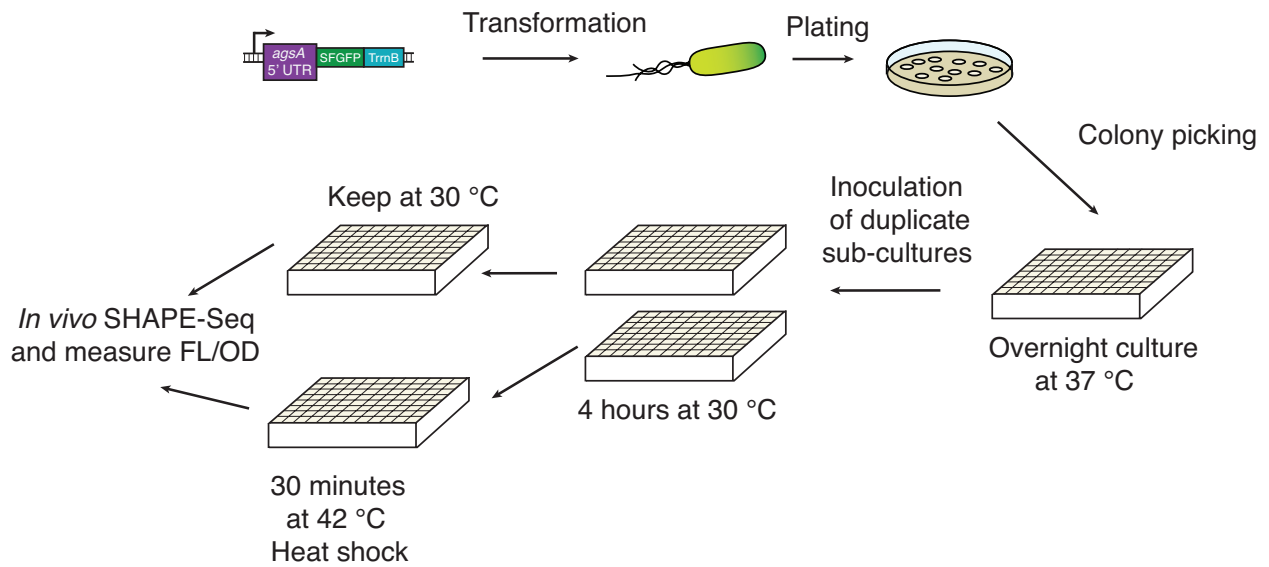

**Figure S2.** Overview of the experimental heat shock protocol for testing the *agsA* thermometer variants and control *in vivo*. The 5' untranslated region of the *agsA* thermometer (WT, G21C and A29C point mutants) was fused to the gene encoding superfolder fluorescent green protein (SFGFP) followed by the *rrnB* transcriptional terminator (TrnB). The resulting constructs were transformed into TG1 *E. coli* and plated onto LB (lysogeny broth)/agar plates with chloramphenicol. Individual colonies were picked and grown overnight in 1 mL LB with chloramphenicol in culture blocks at 37 °C and 1000 rpm, then sub-cultured in 1.2 mL LB with chloramphenicol for 4 hours at 30 °C and 1000 rpm before transfer to 42 °C and 1000 rpm (heat shock condition) for 30 minutes or remaining at 30 °C (no heat shock condition). Cultures were then subjected to in-cell SHAPE-Seq and measurement of fluorescence (FL) and optical density (OD) as described in Experimental Procedures.

30 °C

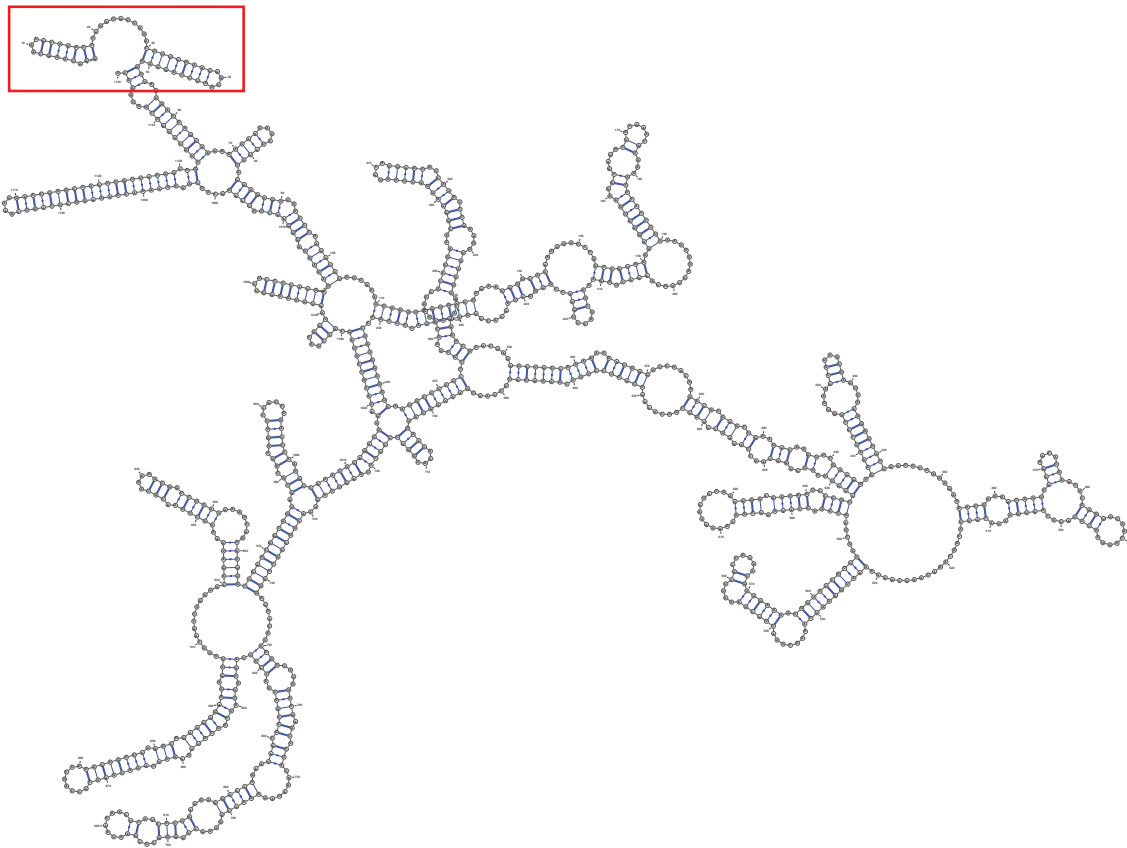

42 °C

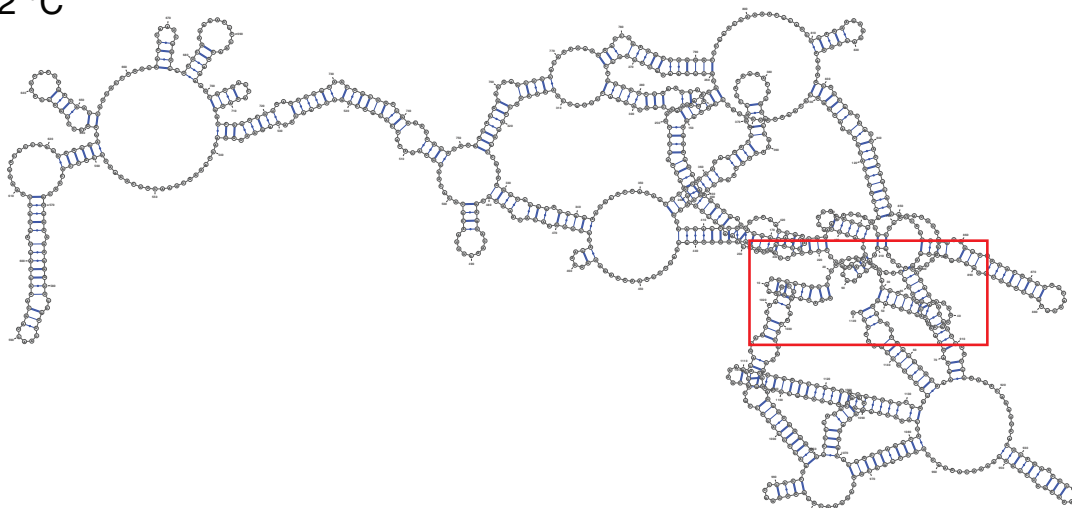

**Figure S3.**

**Figure S3.** Predicted minimum free energy *agsA* WT construct structures for full mRNA sequence *in vivo*. *In vivo* SHAPE-Seq restraints incorporated by RNAStructure Fold<sup>1</sup> covered 5' UTR (red box) and SFGFP leader sequence up until the site of reverse transcription primer binding. The remainder of the RNA was folded without SHAPE-Seq restraints.

30 °C

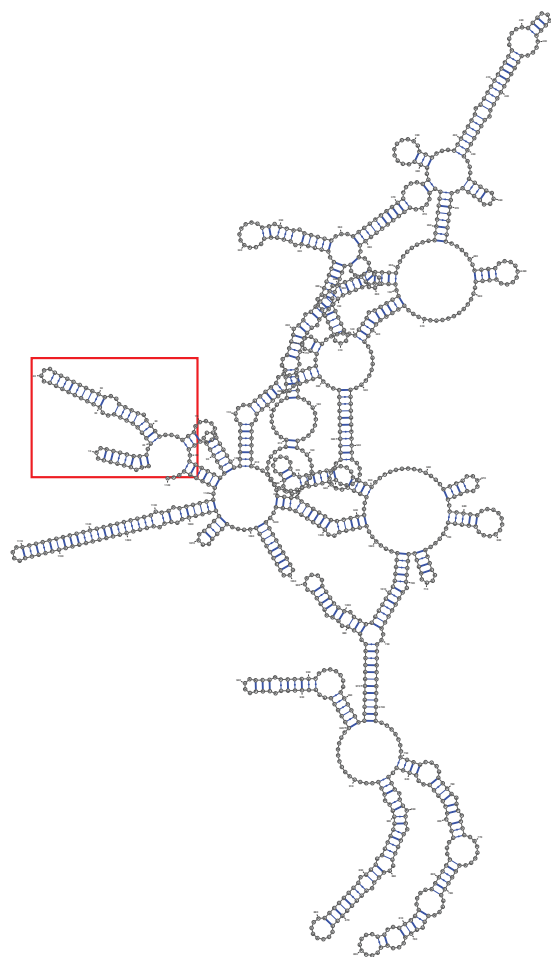

42 °C

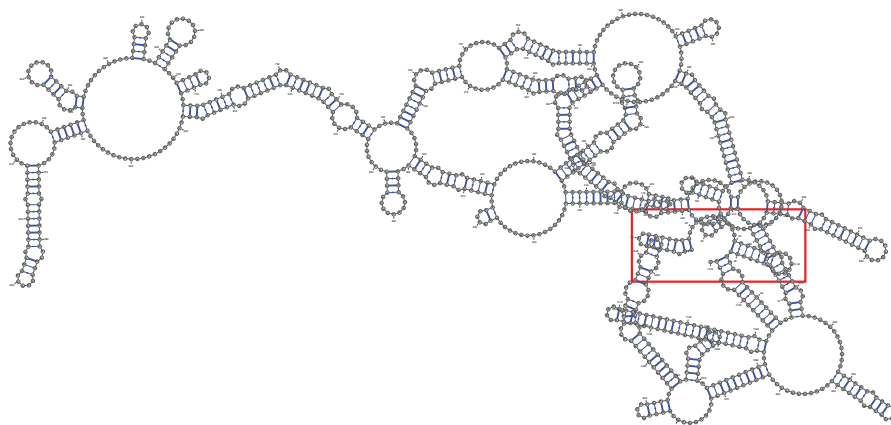

**Figure S4.**

**Figure S4.** Predicted *agsA* G21C construct structures for full mRNA sequence *in vivo*. *In vivo* SHAPE-Seq restraints incorporated by RNAstructure Fold<sup>1</sup> covered the 5' UTR (red box) and SFGFP leader sequence up until the site of reverse transcription primer binding. The rest of the RNA was folded without SHAPE-Seq restraints.

30 °C

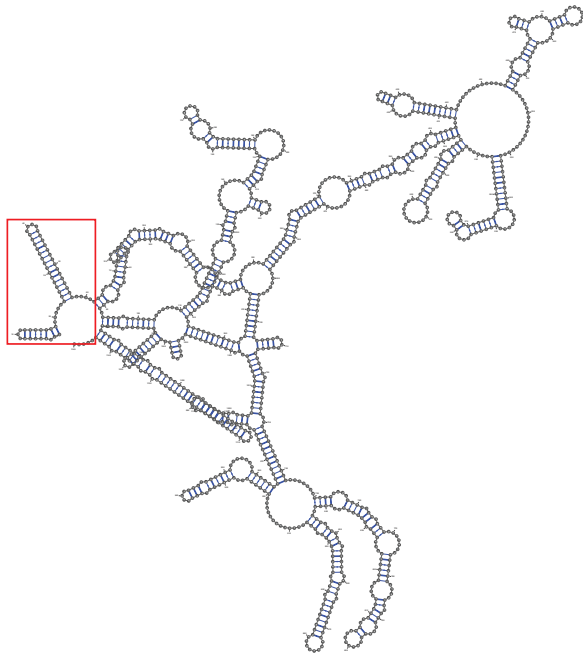

42 °C

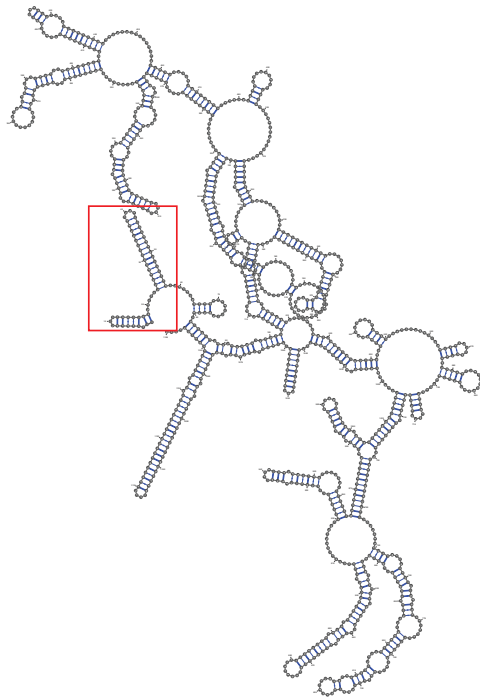

**Figure S5.**



**Figure S5.** Predicted *agsA* A29C construct structures for full mRNA sequence *in vivo*. *In vivo* SHAPE-Seq restraints incorporated by RNAstructure Fold<sup>1</sup> covered the 5' UTR (red box) and SFGFP leader sequence up until the site of reverse transcription primer binding. The remainder of the RNA was folded without SHAPE-Seq restraints.

30 °C

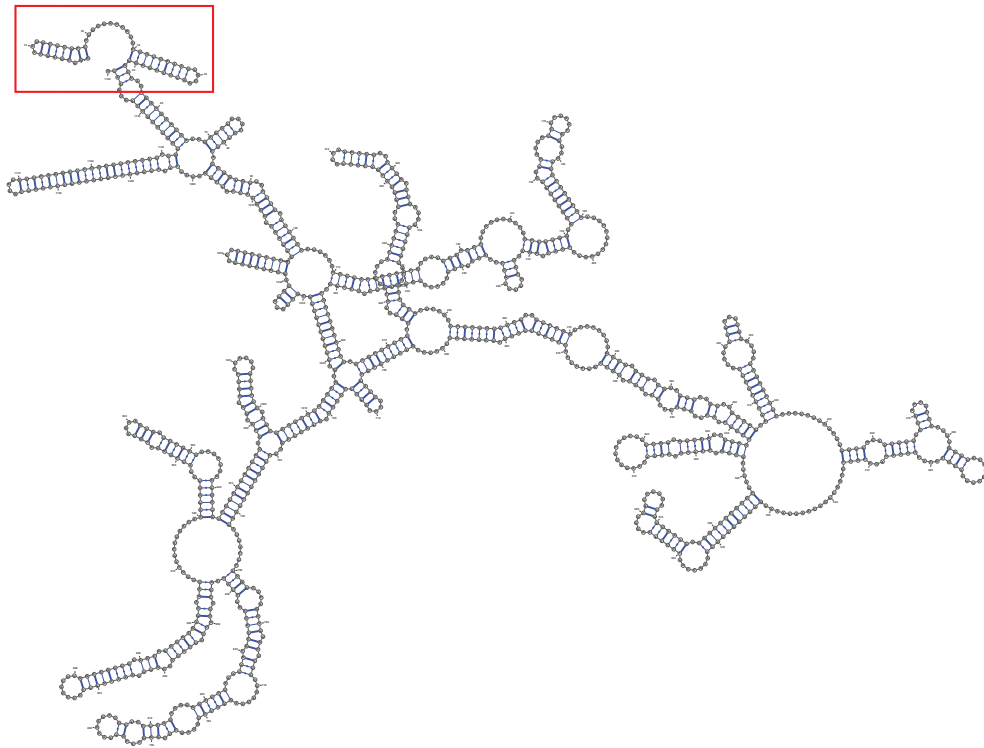

42 °C

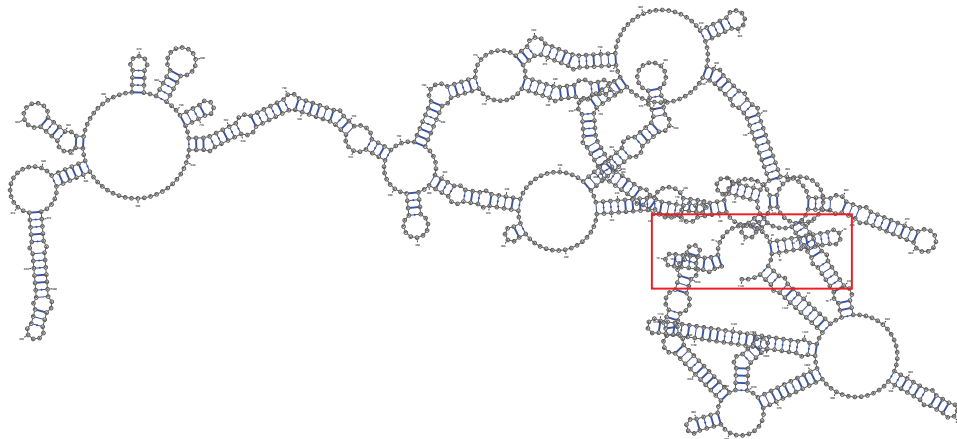

**Figure S6.** Predicted *agsA* WT construct structures for full mRNA sequence *in vitro* in PURExpress without ribosomes. *In vitro* SHAPE-Seq restraints incorporated by RNAstructure Fold<sup>1</sup> covered the 5' UTR (red box) and SFGFP leader sequence up until the site of reverse transcription primer binding. The remainder of the RNA was folded without SHAPE-Seq restraints.

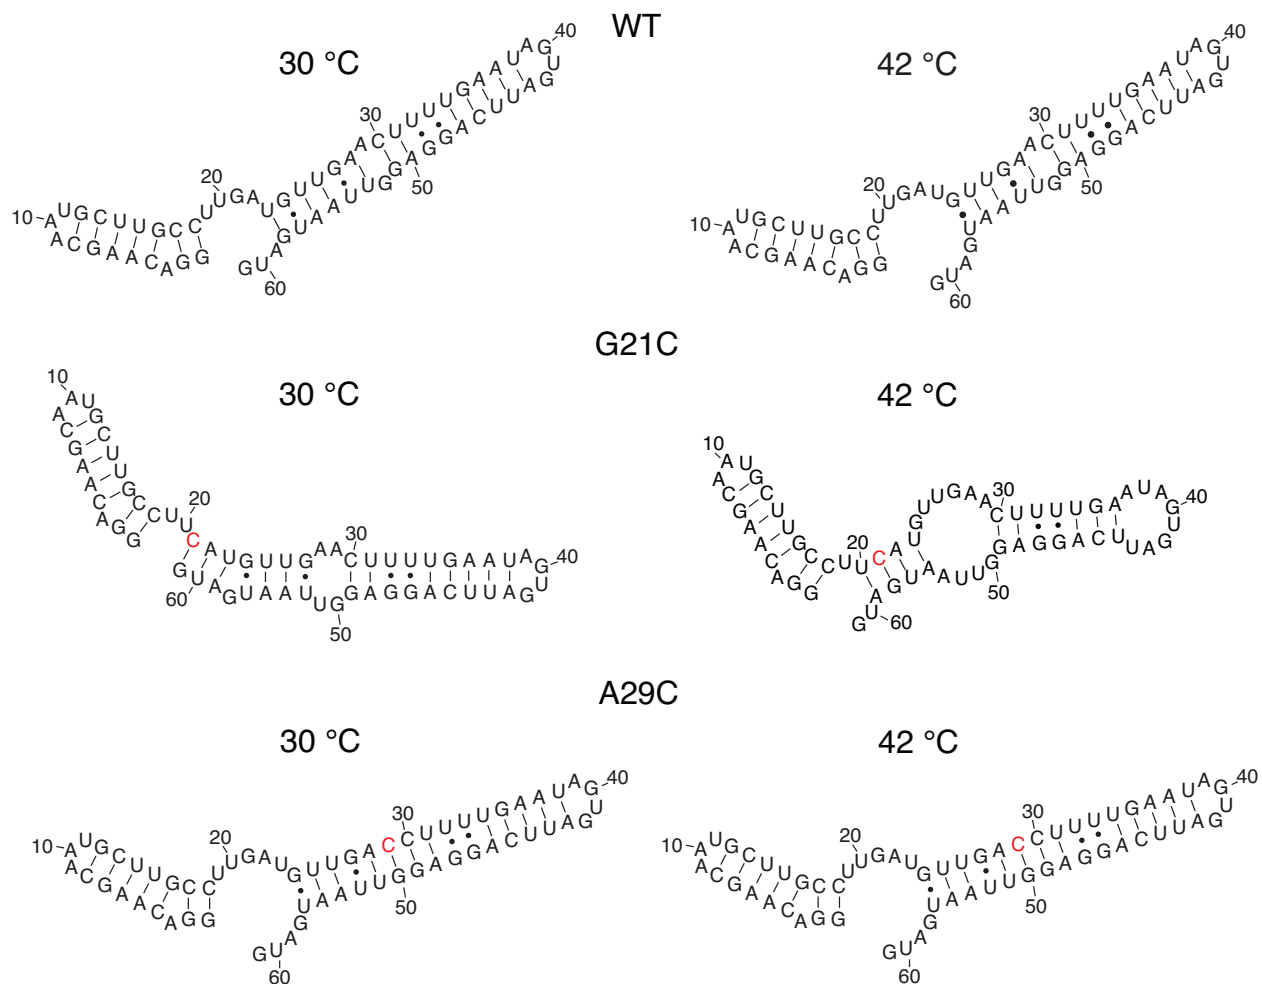

**Figure S7.** Unrestrained minimum free energy predictions of *agsA* construct 5' UTR structure through the start codon. Predicted *agsA* variant structures at 30 °C and 42 °C in the absence of SHAPE reactivity restraints, as predicted by RNAstructure Fold<sup>1</sup>. Point-mutations are highlighted in red.

**a**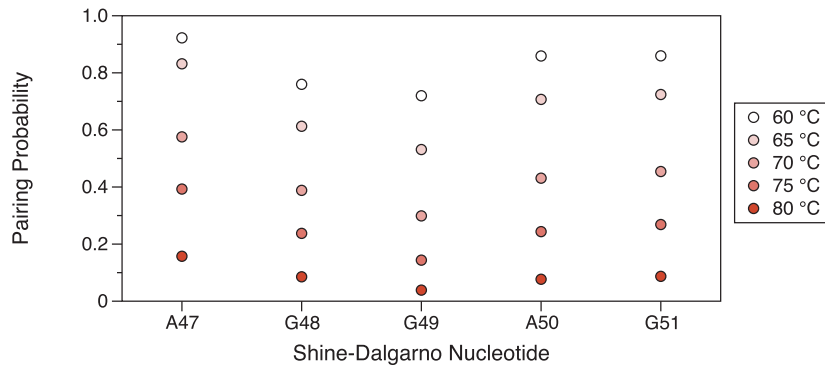**b**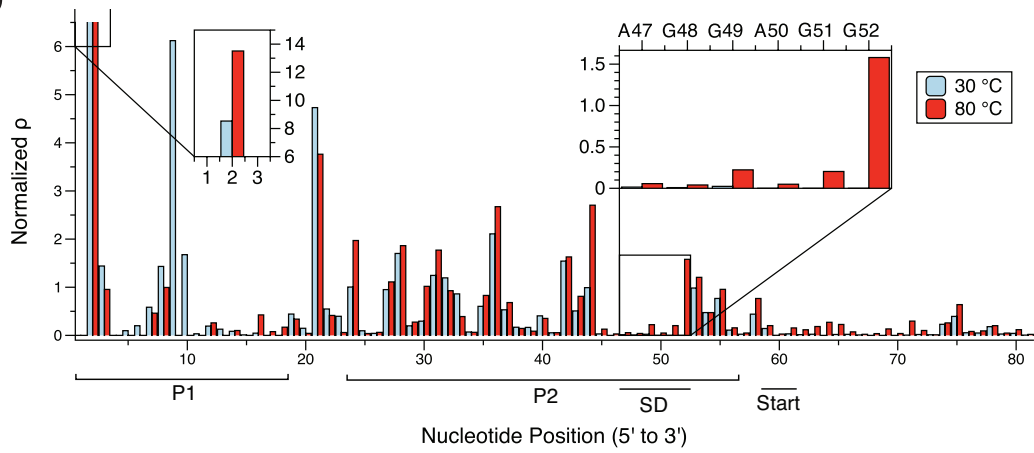**c**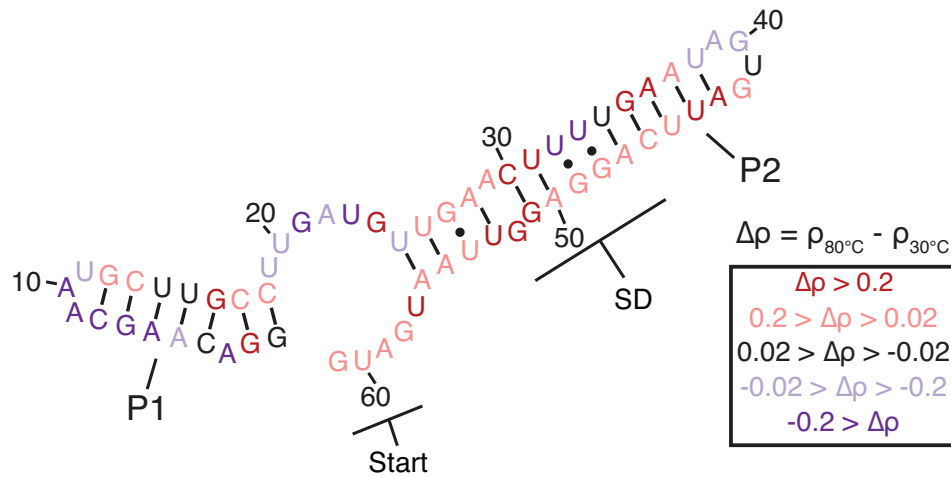**Figure S8**

**Figure S8.** (a) Predicted pairing-probability plot for the *agsA* WT thermometer Shine-Dalgarno sequence in the P2 hairpin at 60-80 °C to determine temperature at which Shine-Dalgarno sequence could show increased reactivity to SHAPE probing. Probabilities determined based on the partition function calculated using RNAstructure. (b) SHAPE-Seq normalized reactivity ( $\rho$ ) plots for *agsA* WT from *in vitro* experiments in folding buffer performed at 30 °C and 80 °C. Inset on the left shows the full scale of reactivities at nucleotide position 2, while the inset on the right shows the reactivities of the SD sequence. (c) Reactivity differences between 80 °C and 30 °C ( $\Delta\rho$ ) overlaid with the predicted *agsA* 5' UTR structure.

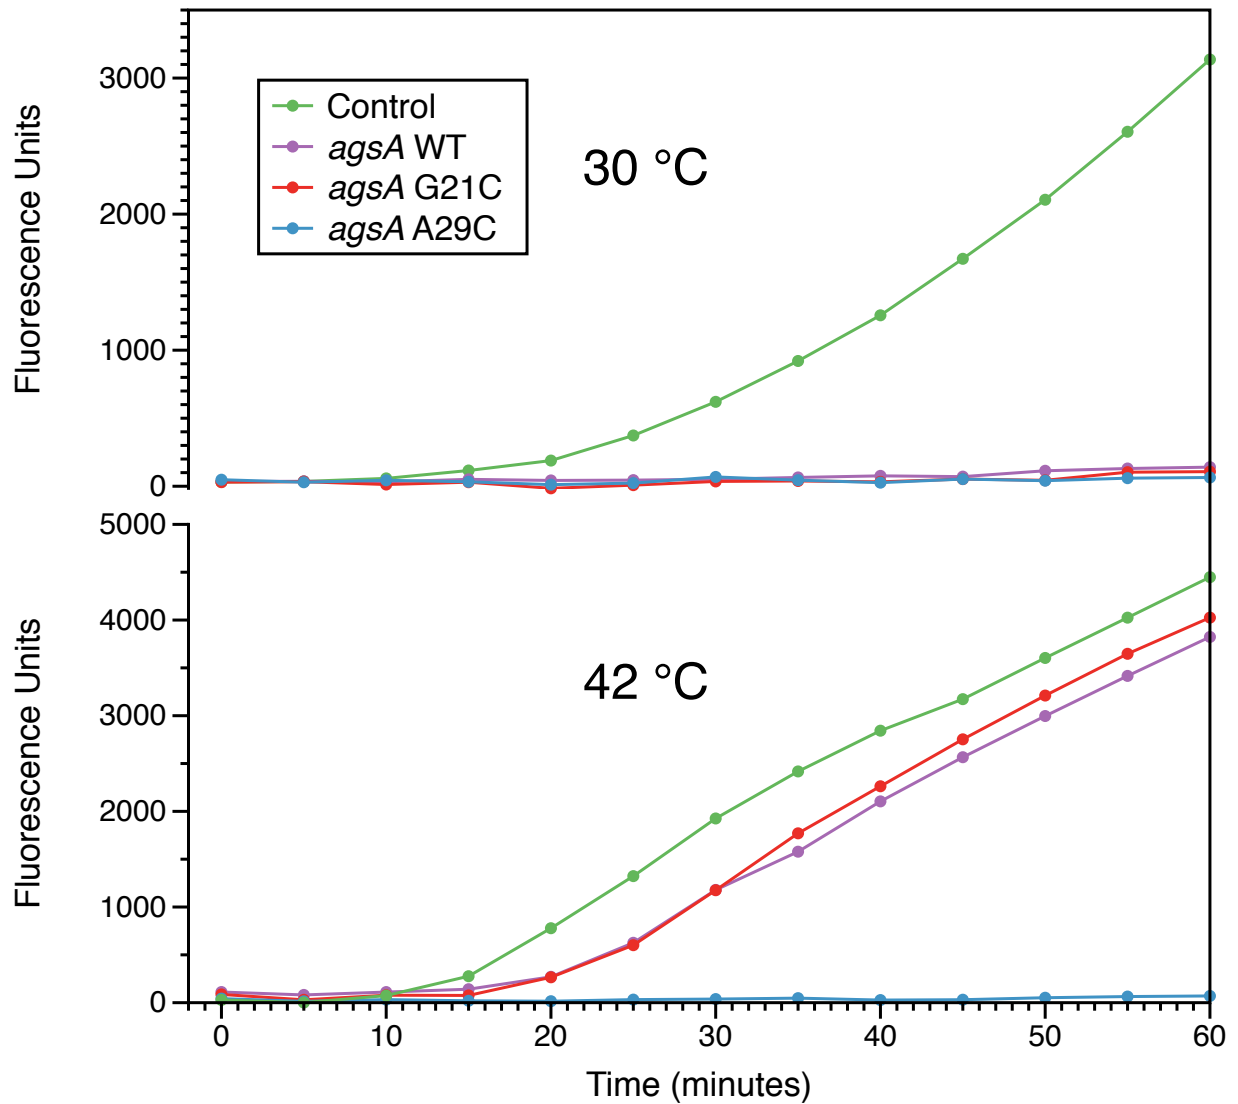

**Figure S9.** PURExpress testing of *agsA* constructs from plasmid DNA templates. (DNA templates consisted of a constitutive promoter followed by *agsA* 5' UTR, SFGFP gene, and intrinsic transcriptional terminator as depicted in Figure S1). Fluorescence traces demonstrate successful thermometer activation in the context of the PURExpress cell-free transcription and translation system.

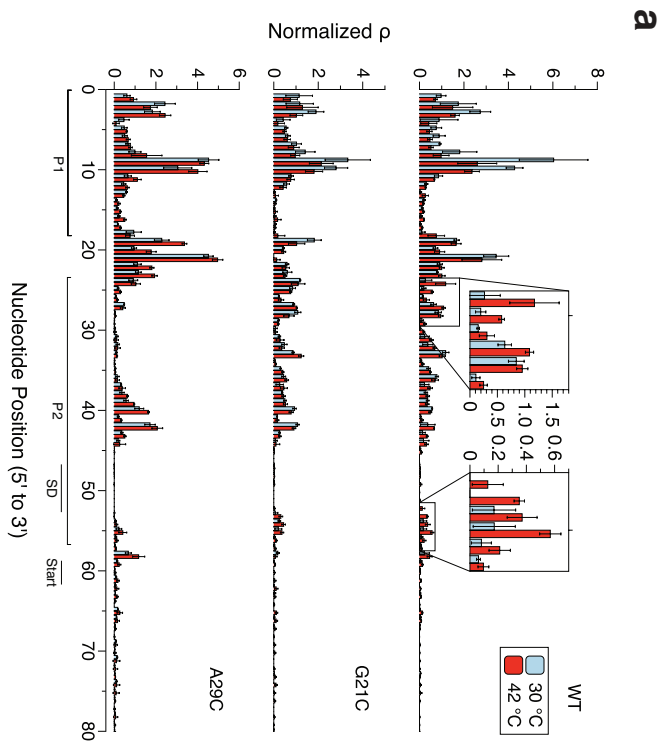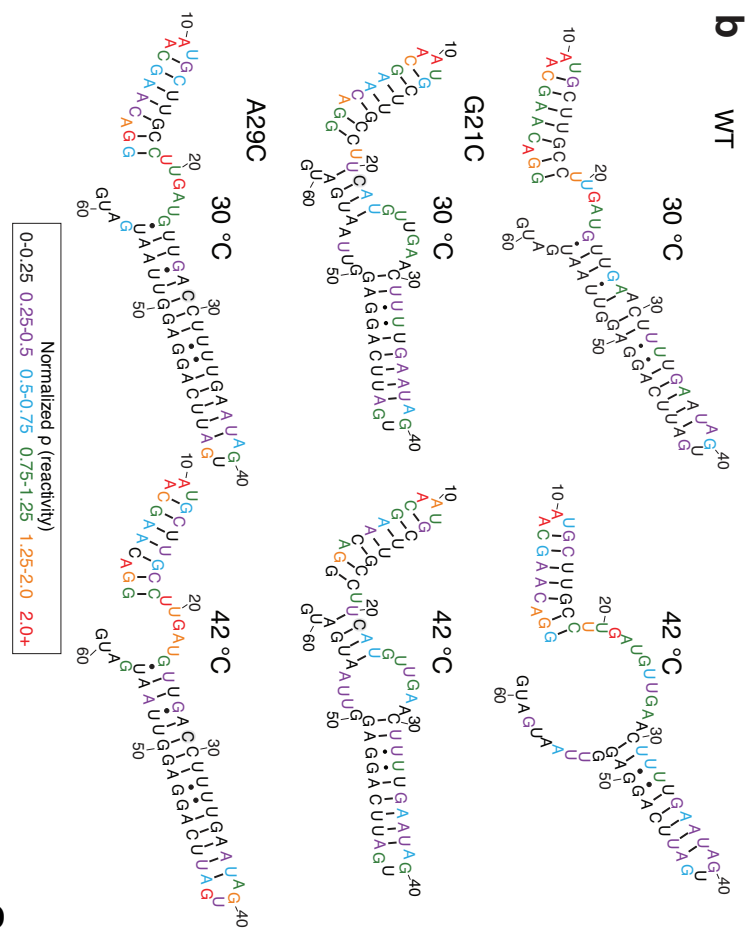

Figure S10

**Figure S10.** SHAPE-Seq characterization of the *agsA* thermometer *in vitro* in buffer. **(a)** Normalized SHAPE-Seq reactivity plots for *agsA* WT, G21C, and A29C variants from triplicate experiments *in vitro* performed on mRNAs equilibrated at 30 °C and 42 °C. Error bars represent sample standard deviation. **(b)** Experimentally-derived minimum free energy (MFE) RNA structures as predicted using the RNAstructure Fold<sup>1</sup> program with the reactivity values from (a) taken as pseudoenergy folding restraints. Nucleotides are color-coded according to normalized SHAPE reactivity ( $\rho$ ), with red indicating high reactivity and black low reactivity. Point-mutated nucleotides are shaded in grey.



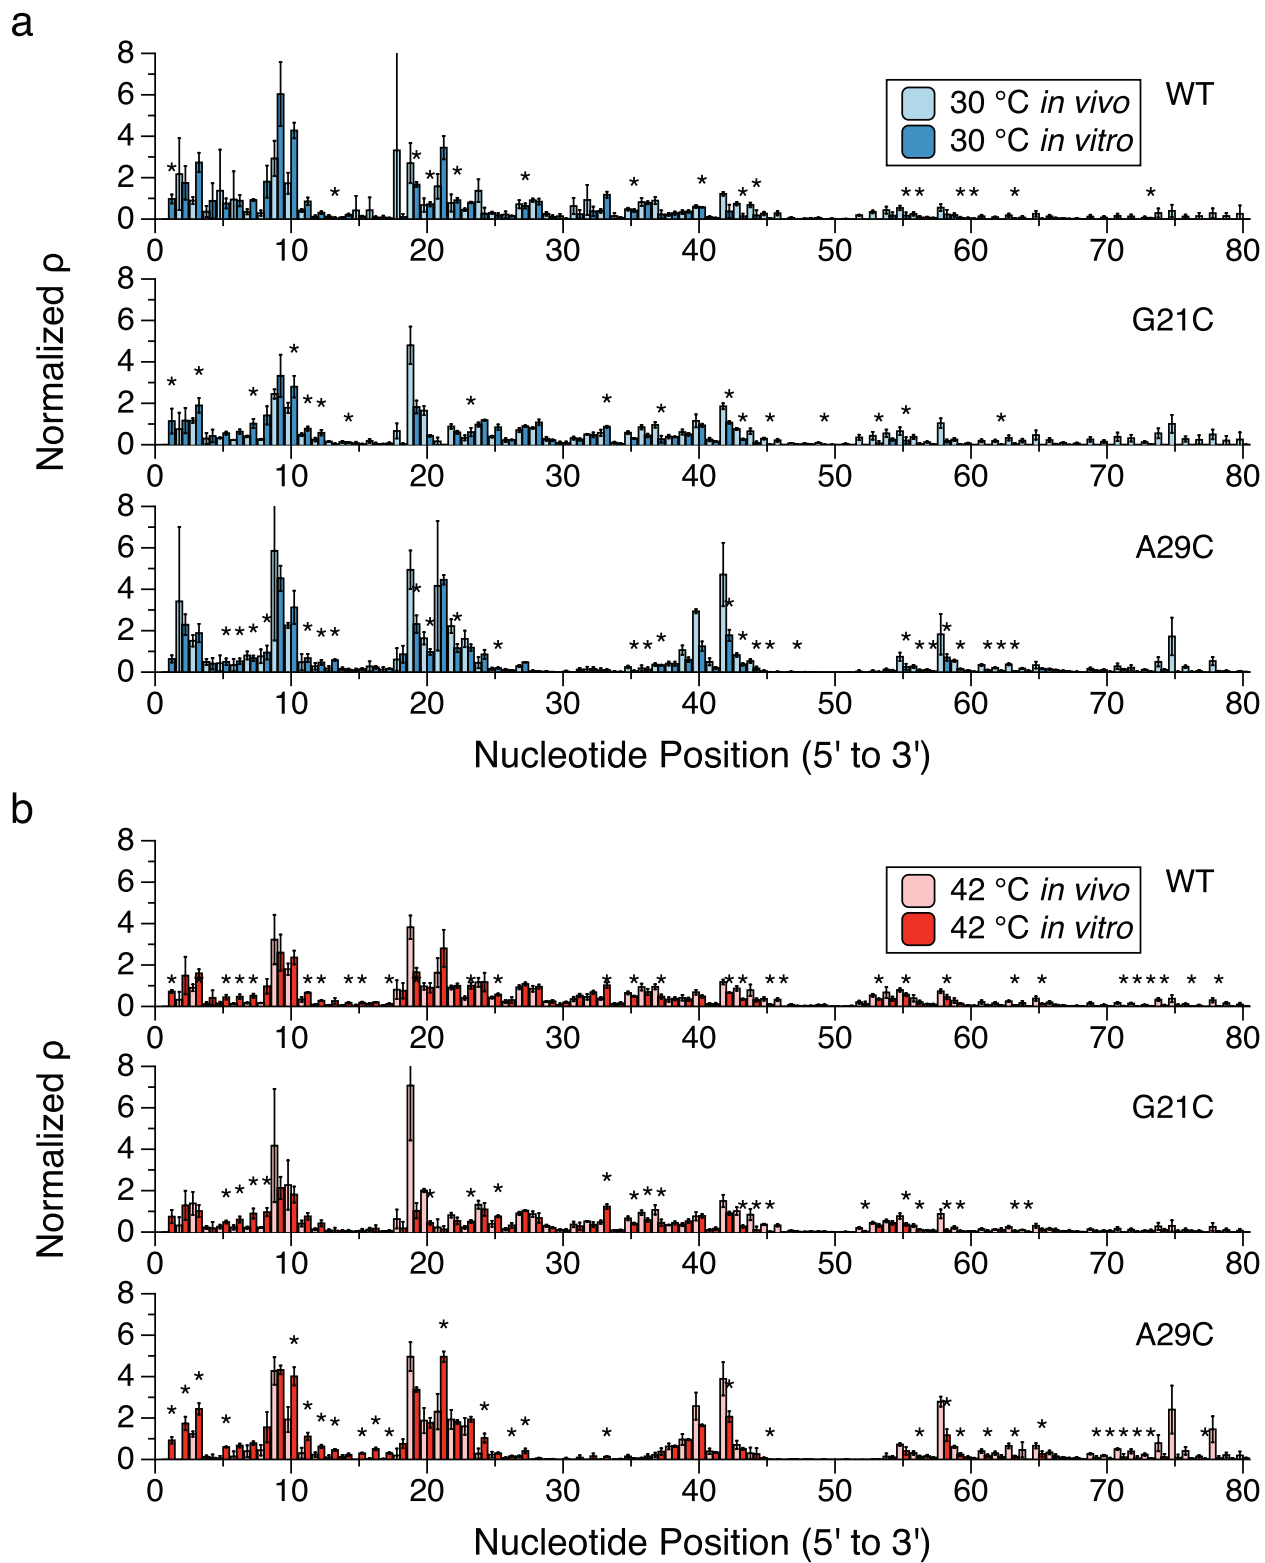

**Figure S11**

**Figure S11.** The effect of active translation on mRNA SHAPE-Seq reactivity. Reactivity comparisons for WT *agsA* construct between *in vivo* and *in vitro* in buffer at 30 °C **(a)** and 42 °C **(b)**. Stars denote statistically significant reactivity differences, as determined using two-sided heteroscedastic Welch's t-tests. Error bars represent sample standard deviation.

Supplementary Tables

Table S1. Plasmids used in this study.

Color code: yellow-promoter, red-insertion sequence, green-SFGFP, light blue-terminator, dark blue-chloramphenicol resistance marker, and grey-origin of replication (p15a)

| Plasmid number | Description   | Sequence                                                                                                                                                                                                                                                                                                                                                                                                                                                                                                                                                                                                                                                                                                                                                                                                                                                                                                                                                                                                                                                                                                                                                                                                                                                                                                                                                                                                                                                                                                                                                                                                                                                                                                                                                                                                                                                                                                                                                                                                                                                                                                                                                                                                                                                                                                                                                                                                                                                                                                                                                                                                                                                                                                                                            |
|----------------|---------------|-----------------------------------------------------------------------------------------------------------------------------------------------------------------------------------------------------------------------------------------------------------------------------------------------------------------------------------------------------------------------------------------------------------------------------------------------------------------------------------------------------------------------------------------------------------------------------------------------------------------------------------------------------------------------------------------------------------------------------------------------------------------------------------------------------------------------------------------------------------------------------------------------------------------------------------------------------------------------------------------------------------------------------------------------------------------------------------------------------------------------------------------------------------------------------------------------------------------------------------------------------------------------------------------------------------------------------------------------------------------------------------------------------------------------------------------------------------------------------------------------------------------------------------------------------------------------------------------------------------------------------------------------------------------------------------------------------------------------------------------------------------------------------------------------------------------------------------------------------------------------------------------------------------------------------------------------------------------------------------------------------------------------------------------------------------------------------------------------------------------------------------------------------------------------------------------------------------------------------------------------------------------------------------------------------------------------------------------------------------------------------------------------------------------------------------------------------------------------------------------------------------------------------------------------------------------------------------------------------------------------------------------------------------------------------------------------------------------------------------------------------|
| n/a            | p15a backbone | <p>gaattctaaagatctttgacagctagctcagtcctaggtataataactagt-----</p> <p>ATGagcaaaggagaagaacttttctactggagttgcccgaattctgtggaattagatggtgatgtt</p> <p>aatgggcacaaatttctgtccgtggagagggtgaaggatgatctacaaacggaaaactcacct</p> <p>taaattatttgcactactggaaaactacctgtccgtggccaacacttgcactactctgacctatgg</p> <p>tgtcaatgctttcccggtatccggatcacatgaaacggcatgacttttcaagagtgccatgcccg</p> <p>aaggttatgtacaggaacgcactatattcaagatgacgggacctacaagacgcgtgctgaa</p> <p>gtcaagttgaaggatgacctgttaacgtatcaggttaagggtattgatttaagaagatgg</p> <p>aaacattcttgacacaactcgagtacaacttaactcacacaatgtatacatcacggcagacaa</p> <p>acaaaagaatggaatcaagctaactcaaaattcgccacaacgtgaagatggtccgtcaact</p> <p>agcagaccattataacaaaatactcaattggcgatggccctgtcctttaccagacaaccattac</p> <p>ctgtcgacacaactgtcctttgaaagatccaacgaaaagcgtgaccacatggtccttctgagt</p> <p>ttgtaactgctgctgggattacacatggcatggatgagctctacaaaataaggatctgaagcttggg</p> <p>cccgaacaaaaactcatctcagaagaggatctgaatagcgcctgcaccatcatcatcatca</p> <p>ttgagttaaacggctccagcttggctgtttggcggatgagagaagatttcagcctgatacagat</p> <p>taaatcagaacgcagaagcggctgtataaaacagaatttgcctggcggcagtagcgcgggtggtc</p> <p>ccacctgacccatgccgaactcagaagtgaacgccgtagcggcagatgtagtgtggggctc</p> <p>cccatgcgagagtagggaactgccagcatcaataaaaacgaaaggctcagtcgaaagactgg</p> <p>gccttctgtttatctgtgtttgctgggtgaactggatccttactcagcttagactgcagttgatcggg</p> <p>cacgtaagagggtccaacttcaccataatgaaataagatcactaccggcgctattttttagttatc</p> <p>gagatttcaggagctaaggaaagctaaaatggagaaaaaaatcactggatataccaccgttgata</p> <p>atccaatggcatcgtaaagaacattttaggcatttcagtcagttgctcaatgtacctataaccag</p> <p>accgttcagctggatattacggccttttaaagaccgtaaagaaaaataagcacaagtttatccgg</p> <p>cctttatcacttctgtccgcctgatgaatgctcatccggaatttcgatggcaatgaaagacggg</p> <p>gagctggtgatatgggatagtttaccctgttacaccgtttccatgagcaaacgaaacgttttc</p> <p>atcgctctggagtgaataccacgacgattccggcagtttctacacataatfcgcaagatgtggcg</p> <p>tgttacgggtgaaaacctggcctatttccctaaagggttattgagaatatgttttctcagccaat</p> <p>ccctgggtgagttaccagtttgaattaaacgtggccaatatggacaacttcttgcceccgttttc</p> <p>acatgggcaaatatfatcgaaggcgacaaggtgctgatgccgctggcgattcaggttcatca</p> <p>tgccgtttgtgatggcttccatgtcggcagaatgcttaataaataacagactcgcgatgagtg</p> <p>caggcggggcgtaattgatafcgagctcgttgactcctgtgatagatccagtaatgacctc</p> <p>agaactccatctggattgtcagaacgctcgggtgccggcggcggtttttattggtgagaatcca</p> <p>agcctccgatcaacgtctcatttcccaaaaagttggcccagggttcccgggtatcaacagggac</p> <p>accaggatttatttctgcgaagtgatctccgtcacaggatttattcggcgcaagtgctg</p> <p>gtgatgctgccaaactactgatttagtgtatgatggtgttttgagggtcctcagtggtctgtttctat</p> <p>cagctgtccctctgttcagctactgacggggtggtgcgtaacggcaaaagcaccgccggacat</p> <p>cagcgttagcggagtgatactggcttactatgttggcactgatgagggtcagtgaaagtcttc</p> <p>atgtggcaggagaaaaaggctgcaccgggtcgtcagcagaatatgtatacaggatatattcc</p> |

|          |                                          |                                                                                                                                                                                                                                                                                                                                                                                                                                                                                                                                                                                                                                                                                                                                                                                                                                                                                                                                                                                                                                                                                                                                                                                                                                                                                                                                                                                                                                                                                                                  |
|----------|------------------------------------------|------------------------------------------------------------------------------------------------------------------------------------------------------------------------------------------------------------------------------------------------------------------------------------------------------------------------------------------------------------------------------------------------------------------------------------------------------------------------------------------------------------------------------------------------------------------------------------------------------------------------------------------------------------------------------------------------------------------------------------------------------------------------------------------------------------------------------------------------------------------------------------------------------------------------------------------------------------------------------------------------------------------------------------------------------------------------------------------------------------------------------------------------------------------------------------------------------------------------------------------------------------------------------------------------------------------------------------------------------------------------------------------------------------------------------------------------------------------------------------------------------------------|
|          |                                          | <p>gcttcctcgctcactgactcgtctacgctcggctgctgactcggcgagcggaaatggcttacga<br/> acggggcgggagatttctggaagatgccaggaagataactaacagggaagtgagagggccgc<br/> ggcaaagccgttttccataggtccgccccctgacaagcatcacgaaatcgtacgctcaaate<br/> agtggtagcgaaccgacaggactataaagataaccaggcgtttccccctggcggctccctcgt<br/> gcgctctcctgttctgctttcggttaccgggtgcattccgctgttatggccgctttgtctattcc<br/> acgctgacactcagttccggtaggcagttcgtccaagctggactgtatgcagaaccccc<br/> gttcagtcggaccgctgcgcttatccggtaactatcgtcttgagccaacccggaaagacatgca<br/> aaagcaccactggcagcagccactggtaattgatttagaggagttagtctgaaatcgtcgcgcg<br/> gttaaggctaaactgaaaggacaagttttggtagctgcgctcctcaagccagttacctcggttca<br/> aagagttgtagctcagagaaccttcgaaaaaccgctgcaaggcggttttcgttttcagagc<br/> aagagattacgcgcagacaaaacgatctcaagaagatcatctattaatcagataaaatattcta<br/> gatttcagtgcatttatcttcaaatgtagcacctgaagtcagccccatcagataaagtgttaatt<br/> ctcatgttgacagcttatcatcgataagctccgatggcgcgagaggctttacactttatgctt<br/> ccggct</p>                                                                                                                                                                                                                                                                                                                                                                                                                                                                                                                                                                 |
| JBL 3048 | WT <i>agsA</i> in p15a backbone          | <p>Insertion sequence:<br/> ggacaagcaatgcttgccttgatgtgaactttgaaatagtattcaggagggttaatg</p>                                                                                                                                                                                                                                                                                                                                                                                                                                                                                                                                                                                                                                                                                                                                                                                                                                                                                                                                                                                                                                                                                                                                                                                                                                                                                                                                                                                                                        |
| JBL 3057 | <i>agsA</i> G21C mutant in p15a backbone | <p>Insertion sequence:<br/> ggacaagcaatgcttgccttCatgttgaactttgaaatagtattcaggagggttaatg</p>                                                                                                                                                                                                                                                                                                                                                                                                                                                                                                                                                                                                                                                                                                                                                                                                                                                                                                                                                                                                                                                                                                                                                                                                                                                                                                                                                                                                                       |
| JBL 3070 | <i>agsA</i> A29C mutant in p15a backbone | <p>Insertion sequence:<br/> ggacaagcaatgcttgccttgatgttgaCcttttgaatagtattcaggagggttaatg</p>                                                                                                                                                                                                                                                                                                                                                                                                                                                                                                                                                                                                                                                                                                                                                                                                                                                                                                                                                                                                                                                                                                                                                                                                                                                                                                                                                                                                                       |
| JBL 001  | empty backbone control                   | <p>gaattctaaagatcctaactcagtaatgagaagcttgggccgaacaaaaactcatctcagaag<br/> aggatctgaatagcggctgcaccatcatcatcatcaltgagttaaacggctccagcttggc<br/> tgttttggcggatgagagaagatttcagcctgatacagattaatcagaacgcagaagcggctc<br/> ataaaacagaatttgcctggcggcagtagcgcgggtgtcccactgacccatgccgaactcag<br/> aagtgaacgccgtagcggcagtgtagtgggggtctcccatgcgagagtagggaactgcc<br/> aggcatcaataaaacgaaaggctcagtcgaaagactgggcctttcgtttatctgtttgtcgg<br/> gactggatccttactcaggtctagactcgacttgatcggcacgtaagaggtccaacttacc<br/> ataatgaaataagataactaccgggctatltttgagttatcgagatttcaggagctaaggaagct<br/> aaaatggagaaaaaaactcctggatataccaccgttatataatcccaatggcatcgtaaagaacat<br/> tttaggcatttcagtcagttgctcaatgtacctaataaccagaccgttccagctggatattacggcctt<br/> ltaaagaccgtaaagaaaaataagcacaagtttatccggcctttatcacttcttggccgctgat<br/> gaatgctcatccggaatttcgatggcaatgaaagacggtagctggatgatgggatagtggtca<br/> cccttgttacaccgtttccatgagcaaacgaaacgtttcatcgtctggagtgaaataccacgac<br/> gatttccggcagtttctacacatataatcgaagatgtggcgtgttacgggtgaaacctggcctatt<br/> ccctaaagggtttatgagaatatttttctcagccaatccctgggtgagttaccagtttggat<br/> ltaaagcgtggcaatatggacaacttcttgcccccgtttaccatgggcaaatattatacgaag<br/> gcgacaaggtgctgatccgctggcgattcaggtcatcatgccgtttgatggcttccatgctc<br/> gcagaatgcttaatgaattacaacagtagctcgcgatgagtgagggcggggcgttaattgatac<br/> gagctcgttggactcctgttgatagatccagtaatgacctcagaactccatctggatttgcaga<br/> acgctcgggtgccggcggcgtttttatgggtgagaatccaagcctccgatcaacgtctcatttgc<br/> ccaaaagtggcccaggccttccgggtatcaacaggacaccaggatttatttctgcgaagtg</p> |

|                     |                                                    |                                                                                                                                                                                                                                                                                                                                                                                                                                                                                                                                                                                                                                                                                                                                                                                                                                                                                                                                                                                                                                                                                                                                                                                                                                                                                                                                                                                                                                                                                                                                                                                                                                                                                                                                                                                                                                                                                                                                                                                                                                                                    |
|---------------------|----------------------------------------------------|--------------------------------------------------------------------------------------------------------------------------------------------------------------------------------------------------------------------------------------------------------------------------------------------------------------------------------------------------------------------------------------------------------------------------------------------------------------------------------------------------------------------------------------------------------------------------------------------------------------------------------------------------------------------------------------------------------------------------------------------------------------------------------------------------------------------------------------------------------------------------------------------------------------------------------------------------------------------------------------------------------------------------------------------------------------------------------------------------------------------------------------------------------------------------------------------------------------------------------------------------------------------------------------------------------------------------------------------------------------------------------------------------------------------------------------------------------------------------------------------------------------------------------------------------------------------------------------------------------------------------------------------------------------------------------------------------------------------------------------------------------------------------------------------------------------------------------------------------------------------------------------------------------------------------------------------------------------------------------------------------------------------------------------------------------------------|
|                     |                                                    | <p>atcttccgtcacaggtatttattcggcgcgcaaaagtgcgtcgggtgatgctgccaaactfactgatttagt<br/> gtatgatggtgttttgagggtcctcagtggtctctgtttctatcagctgtccctcctgttcagctactg<br/> acgggggtggtgcgtaacggcaaaagcaccgcccggacatcagcgcctagcggagtgatactgg<br/> cttactatgttggcactgatgagggtgtcagtgaaagtgcctcatgtggcaggagaaaaaaggctg<br/> caccggtgcgtcagcagaatatgtgatacaggatataatccgcttctcgtcactgactcgtctac<br/> gctcggcgttcgactcggcgagcggaaatggttacgaacggggcggagatttctggaag<br/> atgccaggaagatacttaacagggaagtgagaggccgcgcaaaagccgttttccataggtc<br/> cgccccctgacaagcatcacgaaatctgacgtcaaatacagtggtggcgaaacccgacaggga<br/> ctataagataaccaggcgttccccctggcggctccctcgtgcgtctcctgttctgcttccggtt<br/> taccggtgtcattccgctgttatggccgcttgtctcattccacgctgacactcagttccgggtag<br/> gcagttcgtccaagctggactgtatgcacgaacccccgttcagtcggaccgctgcgccttacc<br/> cgtaactatcgtcttgagtccaacccggaaagacatgcaaaagcaccactggcagcagccact<br/> ggtaattgatttagaggagttagtctgaagtcacgcccggtaaggctaaactgaaaggacaag<br/> tttggtgactgcgctcctccaagccagttacctcgggtcaaaagagttgtagctcagagaaccttc<br/> gaaaaaccgacctgcaaggcgggttttctgtttcagagcaagagattacgcgcagacaaaaacg<br/> atcaagaagatcattattaatcagataaaatatttctagattcagtgcaatttatcttcaaatg<br/> tagcacctgaagtcagccccatacagataaagtgtgaattctcatgtttgacagcttatcatcgataa<br/> gcttccgatggcgcgcccagaggctttacactttatgcttccggct</p>                                                                                                                                                                                                                                                                                                                                                                                                                                                                                                                                                                                                                                                                                                                                                             |
| <p>JBL<br/>2348</p> | <p>gene<br/>expression<br/>control<br/>plasmid</p> | <p>gaattctaaagatctttgacagctagctcagtcctaggtataataactagtgaggagaagaagaaga<br/> gatgcgggaagagagaataataacacaacaatacgtatattatattctccgcaagaagaggaga<br/> ggaagaatgaaatatacagagacaacaacaataaacagcATGagcaaggagaagaacttt<br/> cactggagttgccaattctgttgaattagatggtgatgtaattgggcacaaatttctgtccgtgg<br/> agaggggtaaggtgatgctacaacggaaaactcaccctaaatttattgactactggaaaact<br/> acctgtccgtgccaacactgtcactactctgacctatggtgtcaatgctttcccgttatccgga<br/> tcacatgaaacggcatgacttttcaagagtccatgcccgaaggttatgtacaggaacgcactat<br/> atcttcaagatgacgggacctacaagacgctgctgaagtaagttgaaggatgataccctgt<br/> taatcgtatcgagttaaagggtattgattttaaagaagatggaacattcttgacacaactcgag<br/> tacaacttfaactcacacaatgtatacaccggcagacaacaaaagaatggaatcaaagctaa<br/> cttcaaaattcggcacaacgttgaagatggttccgttcaactagcagaccattatacaaaaatac<br/> ccaattggcgatggccctgtcctttaccagacaaccattacctgtcgacacaatctgtccttccgaa<br/> agatcccaacgaaaagcgtgaccacatggtccttcttgagtttgaactgctgctgggattacacat<br/> ggcatggatgagctctacaaataaggatcttagcataacccttggggccttaaacgggtcttga<br/> ggggttttttggatccttactcagcttagactgcagttgatcgggcacgtaagaggttccaactt<br/> tcaccataatgaaataagatcactaccgggcgtatttttgagttatcgagatttcaggagctaagg<br/> aagctaaaatggagaaaaaatcactggatataccaccgttgatatacccaatggcatcgtaaag<br/> aacatfttgaggcatttcagtcagttgctcaatgtacclataaccagaccgttcagctggatattacg<br/> gcctttttaaagaccgtaaagaaaaataagcacaagtttlatccggccttatttcacattcttcccg<br/> cctgatgaatgctcatccggaatttctgtatggcaatgaaagacgggtgagctggtgatatgggatag<br/> gttcaccctgttacaccgttttccatgagcaaaactgaaacgttttcatcgtctggagtgatacca<br/> cgacgatttccggcagtttctacacatataatcgcaagatgtggcgtgttacgggtgaaaacctggc<br/> ctatftccctaaagggttattgagaatatttttctcagccaatccctgggtgagtttaccaggt<br/> tttgattttaaagcggccaatatggacaacttcttgcctcccggtttaccatgggcaaatattatacg<br/> caaggcgacaaggtgctgatgccgctggcgatcaggttcatcatgccgtttgtgatggttccat<br/> gtcggcagaatgcttaatgaattacaacagtaactgcgatgagtgccagggcggggcgtaattga<br/> tategagctcgttggactcctgttatagatccagtaatgacctcagaactccatctggatttgc<br/> agaacgctcgggttccgcccggcgtttttatgggtgagaatccaagcctccgatcaacgtctcatt</p> |

|  |  |                                                                                                                                                                                                                                                                                                                                                                                                                                                                                                                                                                                                                                                                                                                                                                                                                                                                                                                                                                                                                                                                                                                                                                                                                                                                                                                                            |
|--|--|--------------------------------------------------------------------------------------------------------------------------------------------------------------------------------------------------------------------------------------------------------------------------------------------------------------------------------------------------------------------------------------------------------------------------------------------------------------------------------------------------------------------------------------------------------------------------------------------------------------------------------------------------------------------------------------------------------------------------------------------------------------------------------------------------------------------------------------------------------------------------------------------------------------------------------------------------------------------------------------------------------------------------------------------------------------------------------------------------------------------------------------------------------------------------------------------------------------------------------------------------------------------------------------------------------------------------------------------|
|  |  | <p>ttgccaaaagtggcccagggttcccggatcaacaggacaccaggatttatttctcga<br/>agtgatctccgtcacaggtatttattcggcgcaaagtgcgtcgggtgatgctgccaacttactgat<br/>ttagtgatgatgggtgttttgagggtcctcagtggtcttctgtttctatcagctgtccctcctgttcagct<br/>actgacggggtgggtgcgtaacggcaaaagcaccgccggacatcagcgcctagcggagtgata<br/>ctggcttactatgttggcactgatgagggtgtcagtgaagtgttcctatgtggcaggagaaaaag<br/>gctgcaccgggtgcgtcagcagaatatgtgatacaggatatattccgttcctcgtcactgactcg<br/>ctacgctcggctcgttcgactgcggcgagcggaaatggcttacgaacggggcggagatttctgg<br/>aagatgccaggaagatacttaacagggagtgaagggccgcggcaaagccgttttccatag<br/>gctccgccccctgacaagcatcacgaaatctgacgctcaaatcagtggtggcgaaaccgac<br/>aggactataaagataaccaggcgttccccctggcggtcctcgtgcgctcctgttctcgtctt<br/>cggttaccgggtgctattccgctgttatggccggttgtctattccacgcctgacactcagttccg<br/>gtaggcagttcgtccaagctggactgtatgcacgaacccccgttcagtcgaccgctgcgc<br/>cttatccggtaactatcgtcttgagtccaaccggaaagacatgcaaaagcaccactggcagcag<br/>ccactggaattgatttagaggagttagtctgaagtcacgccgggtaaggctaaactgaaagg<br/>acaagtttgggtgactgcgctcctcaagccagttacctcggttcaagagttggtagctcagaga<br/>accttcgaaaaaccgacctgcaaggcggttttctgtttcagagcaagagattacgcgcagacca<br/>aaacgatctcaagaagatcatcttattaatcagataaaatatttctagatttcagtgcaatttctcttc<br/>aatgtagcacctgaagtcagccccatcagatataagttgtaattctcatgtttgacagcttatc<br/>gataagctccgatggcgccgagaggctttacactttatgctccggct</p> |
|--|--|--------------------------------------------------------------------------------------------------------------------------------------------------------------------------------------------------------------------------------------------------------------------------------------------------------------------------------------------------------------------------------------------------------------------------------------------------------------------------------------------------------------------------------------------------------------------------------------------------------------------------------------------------------------------------------------------------------------------------------------------------------------------------------------------------------------------------------------------------------------------------------------------------------------------------------------------------------------------------------------------------------------------------------------------------------------------------------------------------------------------------------------------------------------------------------------------------------------------------------------------------------------------------------------------------------------------------------------------|

## Works Cited

(1) Reuter, J. S., and Mathews, D. H. (2010) RNAstructure: software for RNA secondary structure prediction and analysis. *BMC Bioinformatics 11*, 129.
